# Supplementary material for: Use of Ganoderma lucidum grown on agricultural waste to remove antibiotics from water
Source: Royal Society of Chemistry journal article supplement (doi:10.1039/d5ra06482a), 2026-01-01
Supplement: d5ra06482a1.pdf [file d5ra06482a1.pdf]

## Appendix/Supplementary Information

### Use of *Ganoderma lucidum* Grown on Agricultural Waste to Remove Antibiotics from Water

Vanessa Juarez<sup>1,2</sup>, Shiva Emami<sup>2</sup>, Ameer Y. Taha<sup>2</sup>, Valeria La Saponara<sup>1</sup>  
[ataha@ucdavis.edu](mailto:ataha@ucdavis.edu) , [ulasaponara@ucdavis.edu](mailto:ulasaponara@ucdavis.edu)

<sup>1</sup> Department of Mechanical and Aerospace Engineering, University of California, Davis,  
One Shields Avenue, Davis, CA, USA 95616

<sup>2</sup> Department of Food Science and Technology, University of California, Davis,  
One Shields Avenue, Davis, CA, USA 95616

#### A.1 Antibiotic Standard and Other Information

This information is provided in **Tables A.1-A.4**.

**Table A.1: Antibiotic Standards<sup>46</sup>**

| Class                    | Antibiotic Abbreviation | Antibiotic Name                     | Catalogue Number |
|--------------------------|-------------------------|-------------------------------------|------------------|
| <i>Methanol Soluble:</i> |                         |                                     |                  |
| <b>Amphenicols</b>       | CAP                     | Chloramphenicol                     | 40524            |
|                          | FF                      | Florfenicol                         | 73231-34-2       |
|                          | FFA                     | Florfenicol amine                   | F405773          |
|                          | TAP                     | Thiamphenicol                       | AAJ63575-03      |
| <b>Sulfonamides</b>      | SDM                     | Sulfadimethoxine                    | 122-11-2         |
|                          | SDZ                     | Sulfadiazine                        | 68-35-9          |
|                          | SMX                     | Sulfamethoxazole                    | 23613            |
|                          | SSZ                     | Sulfasalazine                       | 15025            |
| <b>Lincosamides</b>      | LIN                     | Lincomycin                          | 21526            |
| <b>Quinolones</b>        | ENO                     | Enoxacin                            | 16956            |
|                          | ENRO                    | Enrofloxacin                        | 33699            |
|                          | FLU                     | Flumequine                          | 21645            |
|                          | NOR                     | Norfloxacin                         | 70458-96-7       |
| <b>Macrolides</b>        | ERYTH                   | Erythromycin                        | 114-07-8         |
|                          | VIRG-M1 + VIRG-S1       | Virginiamycin M1 + Virginiamycin S1 | 14503            |

| <i>Water Soluble:</i> |       |              |            |
|-----------------------|-------|--------------|------------|
| <b>B-lactams</b>      | AMOX  | Amoxicillin  | 26787-78-0 |
|                       | AMP   | Ampicillin   | 69-53-4    |
|                       | PEN-G | Penicillin G | 21615      |
|                       | PEN-V | Penicillin V | 23635      |

**Table A.2: Surrogate Standards<sup>46</sup>**

| Surrogate Abbreviation   | Surrogate Name                | Catalogue Number |
|--------------------------|-------------------------------|------------------|
| <i>Methanol Soluble:</i> |                               |                  |
| <b>CAP – D5</b>          | <i>Chloramphenicol – D5</i>   | C325033          |
| <b>FFA – D3</b>          | <i>Florfenicol amine – D3</i> | F405773          |
| <b>TRIM - D3</b>         | <i>Trimethoprim - D3</i>      | T79618           |
| <b>SMZ - D4</b>          | <i>Sulfamethazine - D4</i>    | S699072          |
| <b>SMX – D4</b>          | <i>Sulfamethoxazole – D4</i>  | S699087          |
| <b>LIN – D3</b>          | <i>Lincomycin – D3</i>        | L466202          |
| <b>ENRO – D5</b>         | <i>Enrofloxacin – D5</i>      | E557802          |
| <b>ERYTH – D6</b>        | <i>Erythromycin – D6</i>      | E649953          |
| <i>Water Soluble:</i>    |                               |                  |
| <b>AMP – D5</b>          | <i>Ampicillin – D5</i>        | A634337          |
| <b>PEN-V – D5</b>        | <i>Penicillin V – D5</i>      | 26786            |

**Table A.3: Unlabeled Standard & Unlabeled Surrogate Mix Concentrations<sup>46</sup>**

| Calibration Level | Methanol:Water (1:1) | Unlabeled - Standard Mix | Labeled - Surrogate Mix |
|-------------------|----------------------|--------------------------|-------------------------|
| 0.001 ng/mL       | 1919 µL              | 250 µL                   | 80 µL                   |
| 0.01 ng/mL        | 1910 µL              | 100 µL                   | 80 µL                   |
| 0.1 ng/mL         | 1820 µL              | 10 µL                    | 80 µL                   |
| 0.25 ng/mL        | 1670 µL              | 1 µL                     | 80 µL                   |
| 0.5 ng/mL         | 1915 µL              | 5 µL                     | 80 µL                   |

|           |         |        |       |
|-----------|---------|--------|-------|
| 1 ng/mL   | 1910 µL | 10 µL  | 80 µL |
| 2 ng/mL   | 950 µL  | 10 µL  | 40 µL |
| 5 ng/mL   | 374 µL  | 10 µL  | 16 µL |
| 10 ng/mL  | 364 µL  | 20 µL  | 16 µL |
| 20 ng/mL  | 344 µL  | 40 µL  | 16 µL |
| 50 ng/mL  | 284 µL  | 100 µL | 16 µL |
| 100 ng/mL | 184 µL  | 200 µL | 16 µL |

**Table A.4: Mobile phases<sup>46</sup>**  
A: 0.1 % formic acid in water  
B: 0.1 % formic acid in Acetonitrile

|   | Time      | A       | B        | Flow         | Pressure   |
|---|-----------|---------|----------|--------------|------------|
| 1 | 8.00 min  | 80.00 % | 20.00 %  | 0.300 mL/min | 600.00 bar |
| 2 | 11.00 min | 60.00 % | 40.00 %  | 0.300 mL/min | 600.00 bar |
| 3 | 13.00 min | 0.00 %  | 100.00 % | 0.300 mL/min | 600.00 bar |
| 4 | 15.00 min | 0.00 %  | 100.00 % | 0.300 mL/min | 600.00 bar |
| 5 | 17.00 min | 90.00 % | 10.00 %  | 0.300 mL/min | 600.00 bar |
| 6 | 20.00 min | 90.00 % | 10.00 %  | 0.300 mL/min | 600.00 bar |

## A.2 Matrix Effects

Matrix effects (ME) were calculated as the ratio of the peak area of the antibiotic standards (unlabeled and labeled) in sample spiked after extraction (ME-D0) to the peak area of antibiotic standards in pure solvent (**Table A.5**). Concentrations for quinolones including NOR and ENO in Day 0 samples (n=4) were higher than the expected concentration of 20 ng/ml (Figure 2). The mean concentration of NOR in Water-Mycelium-Antibiotic (treated) samples (n=4) was 198.59

ng/mL  $\pm$  51.11 ng/mL SD. The mean concentration of ENO was 161.35 ng/mL  $\pm$  48.49 ng/mL SD. In assessing matrix effects for the three significant quinolones (enrofloxacin ENRO, norfloxacin NOR, and enoxacin ENO), the surrogate ENRO-D5 (enrofloxacin-D5) was used. Analytes NOR and ENO show different matrix effects compared to the surrogate ENRO-D5. Particularly, ENO showed ion enhancements (87% and 108%), NOR did not show major ion suppression or ion enhancement (126% and 181%), and ENRO-D5 showed ion suppression (42% and 21%). The discrepancies in the matrix effects of the analytes NOR and ENO (quinolones) and surrogate ENRO-D5 may affect the accuracy in concentrations, resulting in overestimated concentrations.

ENRO did not exhibit high Day 0 concentrations as the other two quinolones. This coincides with ENRO and ENRO-D5 behaving similarly in terms of matrix effects (**Table A.6**). Low concentrations found for ENRO (6.14 ng/ml  $\pm$  0.62 ng/mL SD) may be due to quick adsorption to biomass on Day 0. Future studies are required to test whether the biomass is adsorbing the antibiotics and therefore reducing the initial concentration levels.

**Table A.5:** Matrix effects for 20 antibiotic standards (unlabeled standard) and 10 isotopically labeled standards in Day 0. Matrix effects were calculated by dividing the peak area (response) in Water-Mycelium samples (WM) spiked with standards right after extraction (ME, n=2) to the peak area in pure solvent.

| Antibiotic Abbreviation | Antibiotic Name          | Matrix Effects: Day0 Sample 1 | Matrix Effects: Day0 Sample 2 |
|-------------------------|--------------------------|-------------------------------|-------------------------------|
| <b>CAP-D5</b>           |                          | <b>99%</b>                    | <b>16%</b>                    |
| CAP                     | <i>Chloramphenicol</i>   | 121%                          | 46%                           |
| TAP                     | <i>Thiamphenicol</i>     | 31%                           | 7%                            |
| FF                      | <i>Florfenicol</i>       | 64%                           | 20%                           |
| <b>FFA-D3</b>           |                          | <b>59%</b>                    | <b>30%</b>                    |
| FFA                     | <i>Florfenicol amine</i> | 43%                           | 26%                           |
| <b>SMX-D4</b>           |                          | <b>142%</b>                   | <b>45%</b>                    |
| SMX                     | <i>Sulfamethoxazole</i>  | 95%                           | 49%                           |
| SDM                     | <i>Sulfadimethoxine</i>  | 87%                           | 49%                           |
| VIRG-M1                 | <i>Virginiamycin M1</i>  | 90%                           | 64%                           |

|                 |                         |             |            |
|-----------------|-------------------------|-------------|------------|
| VIRG-S1         | <i>Virginiamycin S1</i> | 158%        | 168%       |
| <b>SMZ-D4</b>   |                         | <b>81%</b>  | <b>22%</b> |
| SSZ             | <i>Sulfasalazine</i>    | 66%         | 47%        |
| SDZ             | <i>Sulfadiazine</i>     | 50%         | 25%        |
| <b>AMP-D5</b>   |                         | <b>116%</b> | <b>73%</b> |
| AMP             | <i>Ampicillin</i>       | 79%         | 55%        |
| AMOX            | <i>Amoxicillin</i>      | 83%         | 61%        |
| <b>PEN-V-D5</b> |                         | <b>84%</b>  | <b>37%</b> |
| PEN-G           | <i>Penicillin G</i>     | 136%        | 77%        |
| PEN-V           | <i>Penicillin V</i>     | 108%        | 79%        |
| <b>LIN-D3</b>   |                         | <b>132%</b> | <b>54%</b> |
| LIN             | <i>Lincomycin</i>       | 105%        | 69%        |
| <b>ENRO-D5</b>  |                         | <b>42%</b>  | <b>21%</b> |
| ENRO            | <i>Enrofloxacin</i>     | 48%         | 48%        |
| NOR             | <i>Norfloxacin</i>      | 126%        | 181%       |
| ENO             | <i>Enoxacin</i>         | 87%         | 108%       |
| <b>TRIM-D3</b>  |                         | <b>97%</b>  | <b>36%</b> |
| FLU             | <i>Flumequine</i>       | 104%        | 80%        |
| <b>ERYTH-D6</b> |                         | <b>65%</b>  | <b>13%</b> |
| ERYTH           | <i>Erythromycin</i>     | 50%         | 16%        |

It should be noted that the matrix effects results (ME 1 and ME 2, **Table A.5**) showed high variation. This is likely because these samples were only vortexed and not centrifuged. This could likely result in inconsistent extraction of matrix components into the supernatant phase, and thereby variable matrix effects. Matrix effects show that the ionization of the antibiotic analytes is affected by matrix compounds within the sample extracts due to lack of silanization of Day 0 samples. Stability is known to be affected by temperature, solvent composition and, in this case, container type<sup>47</sup>. However, there were good extraction recoveries observed for the majority of compounds. Lower recoveries could be caused by the presence of organic matter in the matrix, with surfactant properties that could increase signal intensity, and cause suppression by promoting ionization in the positive electrospray (Yang and Carlson, J Chromatogr A. 2004; 1038:141). Higher recoveries are found to possibly be due to more antibiotic adsorption into the biomass than the mycelium.

## A.2 Additional Information on Statistical Analysis, Additional Plots

The results of the statistical analyses are reported in **Tables A.6-A.8**:

**Table A.6:** Results of statistical analysis on log<sub>10</sub>(antibiotics concentrations), [ng/mL])

| Class       | Name | Significant (p<0.05)? | (If significant)<br>reason for change/<br>control or treated ? |
|-------------|------|-----------------------|----------------------------------------------------------------|
| Amphenicols | CAP  | Yes                   | Treatment/same                                                 |
|             | FF   | No                    |                                                                |

|                     |         |     |                                                 |
|---------------------|---------|-----|-------------------------------------------------|
|                     | FFA     | No  |                                                 |
|                     | TAP     | Yes | Treatment/same                                  |
| <b>Sulfonamides</b> | SDM     | Yes | Treatment/ <b>treated</b>                       |
|                     | SDZ     | No  |                                                 |
|                     | SMX     | No  |                                                 |
|                     | SSZ     | Yes | Time, interaction/ <b>treated</b>               |
| <b>Lincosamides</b> | LIN     | No  |                                                 |
| <b>Quinolones</b>   | ENO     | Yes | Time, treatment/ <b>treated</b>                 |
|                     | ENRO    | Yes | Time, treatment,<br>interaction/ <b>treated</b> |
|                     | FLU     | Yes | Treatment/same                                  |
|                     | NOR     | Yes | Time, treatment/ <b>treated</b>                 |
| <b>Macrolides</b>   | ERYTH   | Yes | Time, treatment,<br>interaction/control         |
|                     | VIRG-M1 | Yes | Treatment/same                                  |
|                     | VIRG-S1 | Yes | Time, treatment/control                         |
| <b>B-lactams</b>    | AMOX    | Yes | Treatment/same                                  |
|                     | AMP     | Yes | Treatment/same                                  |
|                     | PEN-G   | Yes | Time/control                                    |
|                     | PEN-V   | No  |                                                 |

**Table A.7:** Results of effective treatment on log10(concentrations [ng/mL]) of quinolones ENO, ENRO, NOR, at 5% significance level, with two-way repeated ANOVA

| <b>Source of Variation for ENO</b>  | <b>% of total variation</b> | <b>P value</b> | <b>Significant?</b> |
|-------------------------------------|-----------------------------|----------------|---------------------|
| Interaction Time x ENO Treatment    | 0.8524                      | 0.48           | No                  |
| Time                                | 21.32                       | 0.0124         | Yes                 |
| ENO Treatment                       | 60.7                        | 0.0017         | Yes                 |
| Variation among Subjects            | 8.096                       | 0.4576         | No                  |
|                                     |                             |                |                     |
| <b>Source of Variation for ENRO</b> | <b>% of total variation</b> | <b>P value</b> | <b>Significant?</b> |
| Interaction Time x ENRO Treatment   | 7.763                       | 0.0106         | Yes                 |
| Time                                | 23.23                       | 0.001          | Yes                 |
| ENRO Treatment                      | 56.95                       | 0.0007         | Yes                 |
| Variation among Subjects            | 5.034                       | 0.2255         | No                  |
|                                     |                             |                |                     |
| <b>Source of Variation for NOR</b>  | <b>% of total variation</b> | <b>P value</b> | <b>Significant?</b> |
| Interaction Time x NOR Treatment    | 0.1139                      | 0.8723         | No                  |
| Time                                | 33.88                       | 0.0331         | Yes                 |
| NOR Treatment                       | 30.76                       | 0.0213         | Yes                 |
| Variation among Subjects            | 14.07                       | 0.6436         | No                  |

**Table A.8:** Results of effective treatments effective treatment on log10(concentrations [ng/mL]) on sulfonamides SDM, SSZ, at 5% significance level, with mixed-effects analysis

| <b>Mixed-effects model for SDM</b>       |                  |                     |
|------------------------------------------|------------------|---------------------|
| Fixed effects (type III), SDM            | <b>P value</b>   | <b>Significant?</b> |
| Time                                     | 0.125            | No                  |
| SDM Treatment                            | 0.0329           | Yes                 |
| Interaction Time x SDM Treatment         | 0.2898           | No                  |
|                                          |                  |                     |
| Random effects, SDM                      | <b>Stand Dev</b> | <b>Variance</b>     |
| Subject variations                       | 0.1032           | 0.01064             |
| Residual                                 | 0.1723           | 0.02967             |
| <b>Was the matching effective (SDM)?</b> |                  |                     |
| Chi-square, df                           | 0.3613, 1        |                     |
| P value                                  | 0.5478           |                     |
| Is there significant matching (P<0.05)?  | No               |                     |
|                                          |                  |                     |
| <b>Mixed-effects model for SSZ</b>       |                  |                     |
| Fixed effects (type III), SSZ            | <b>P value</b>   | <b>Significant?</b> |
| Time                                     | 0.0393           | Yes                 |
| SSZ Treatment                            | 0.0657           | No                  |
| Interaction Time x SSZ Treatment         | 0.0233           | Yes                 |
|                                          |                  |                     |
| Random effects, SSZ                      | <b>Stand Dev</b> | <b>Variance</b>     |
| Subject variations                       | 0.8266           | 0.6833              |
| Residual                                 | 0.4281           | 0.1833              |
| <b>Was the matching effective (SSZ)?</b> |                  |                     |
| Chi-square, df                           | 4.861, 1         |                     |
| P value                                  | 0.0285           |                     |
| Is there significant matching (P<0.05)?  | Yes              |                     |



Plots of the log<sub>10</sub> concentrations (in ng/mL) of 15 antibiotics are shown in **Figures A.1-A.6**.

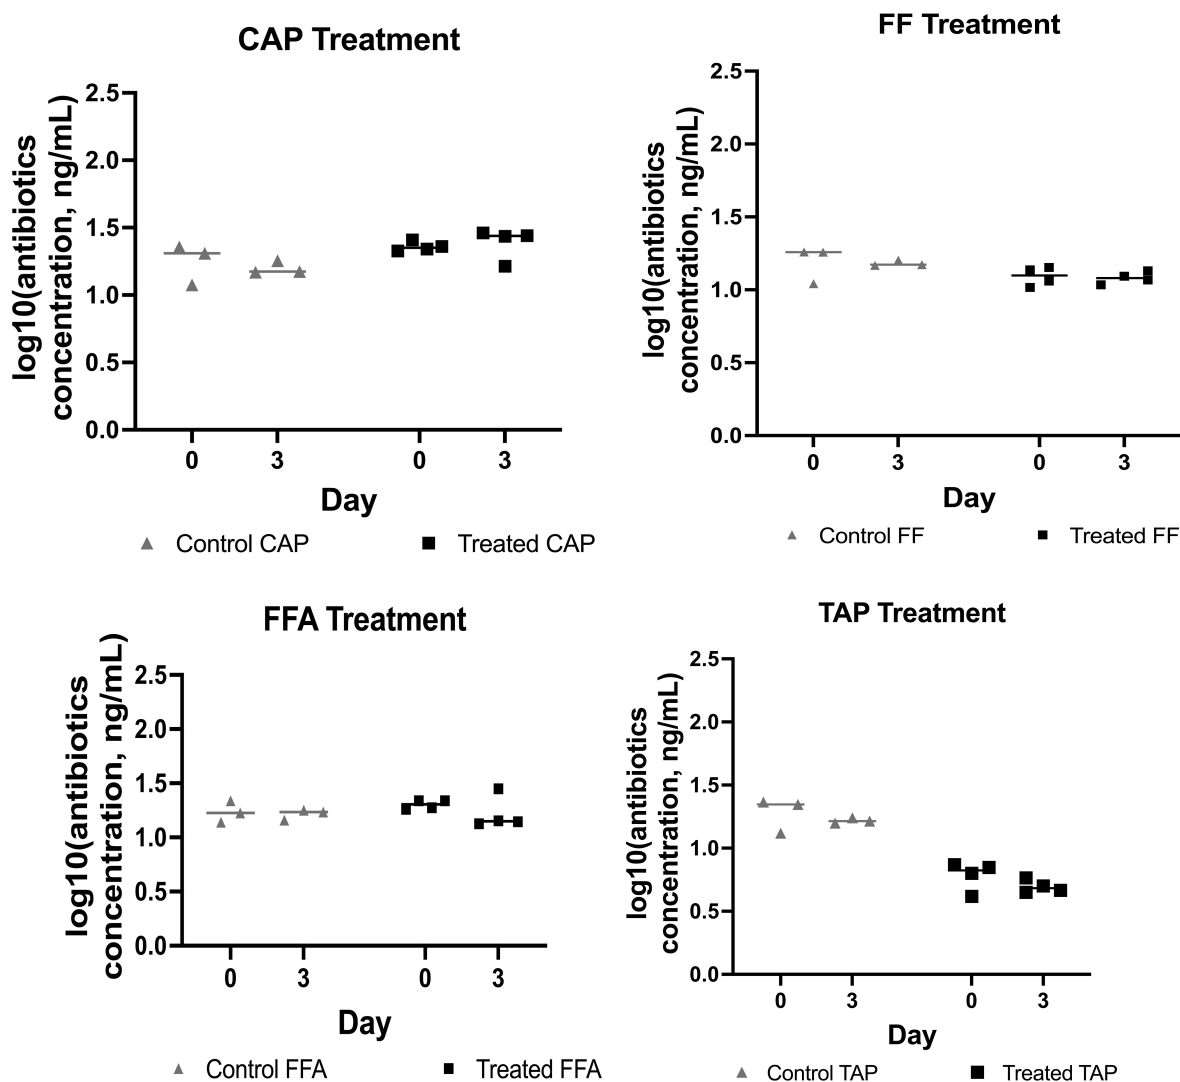

**Figure A.1:** log<sub>10</sub>(concentration) changes for amphenicols CAP, FF, FFA and TAP. The solid line is the median of the data points for that group.

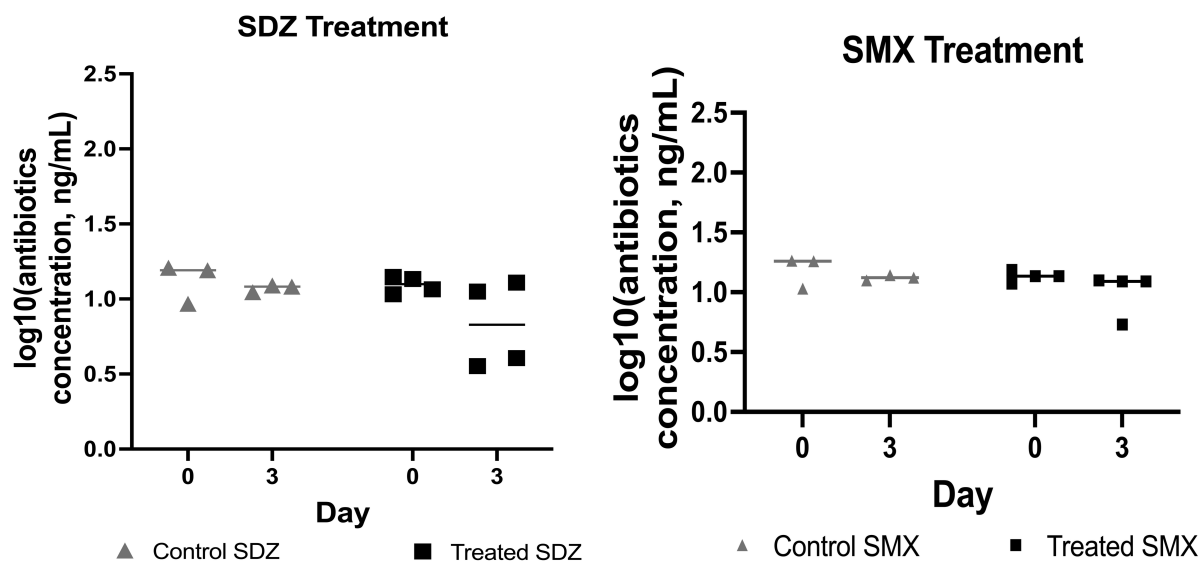

**Figure A.2:** log10(concentration) changes for sulfonamides SDZ and SMX. The solid line is the median of the data points for that group.

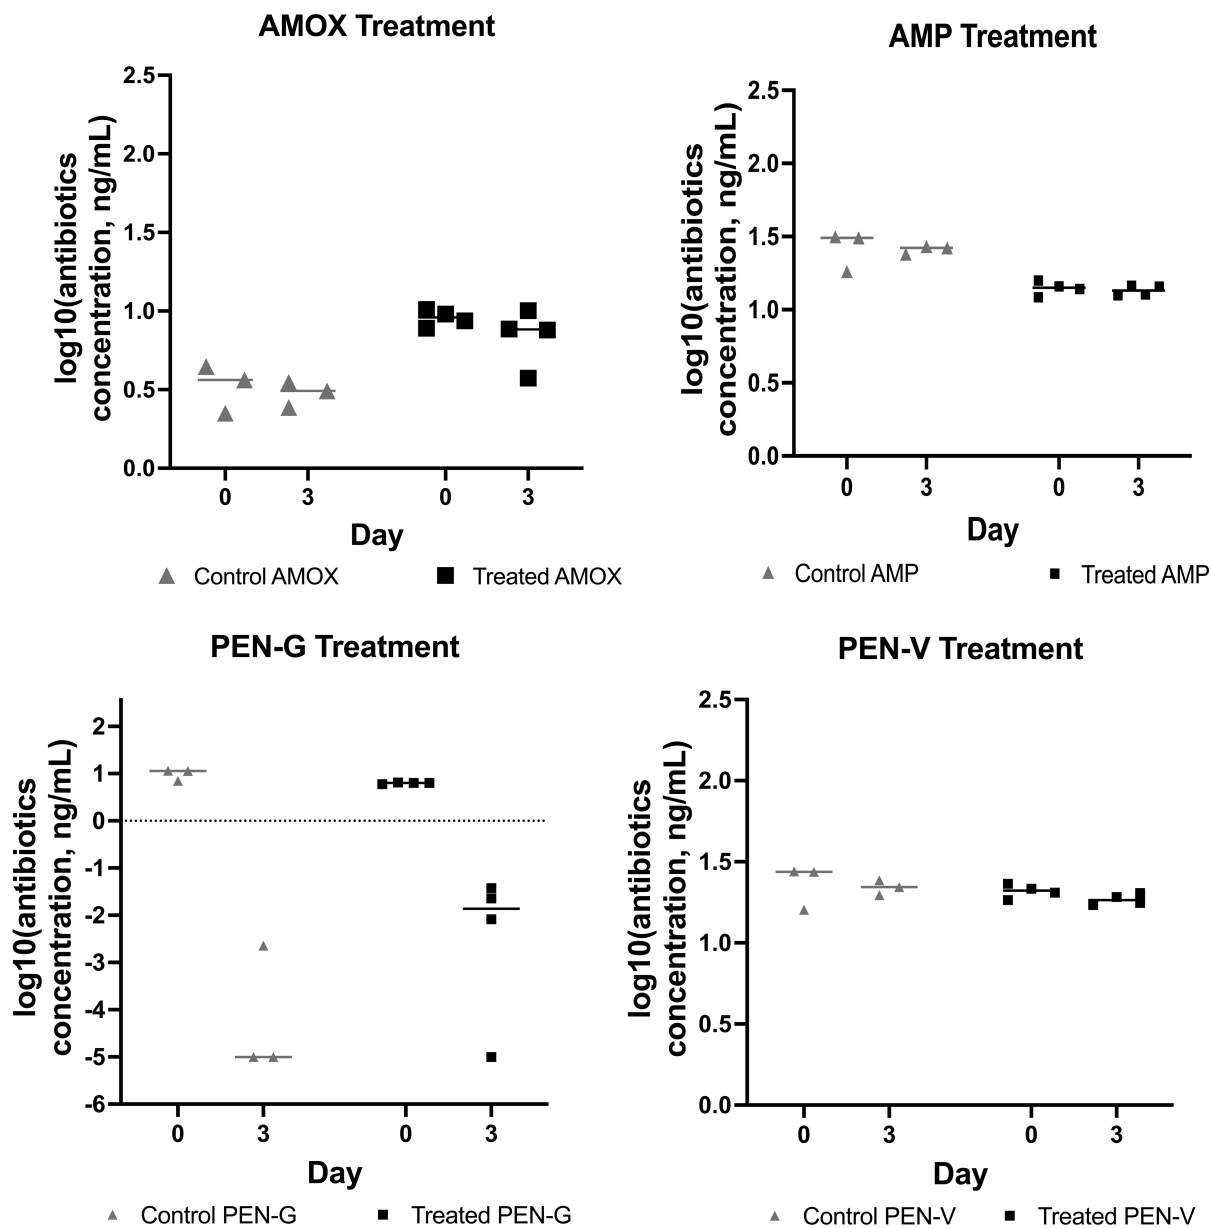

**Figure A.3:**  $\log_{10}(\text{concentration})$  changes for B-lactams AMOX, AMP, PEN-G, PEN-V. The solid line is the median of the data points for that group.

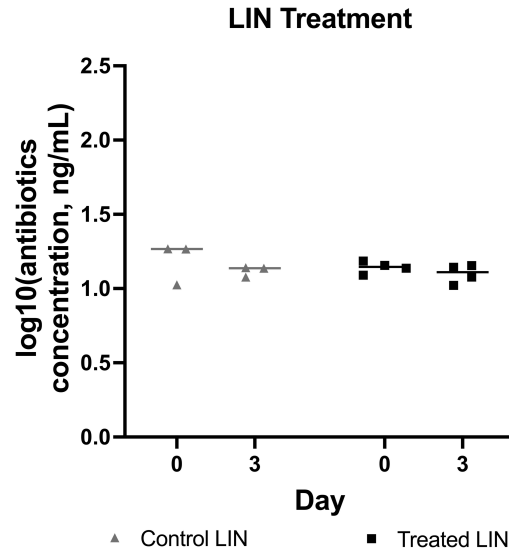

**Figure A.4:** log10(concentration) changes for lincosamide LIN. The solid line is the median of the data points for that group.

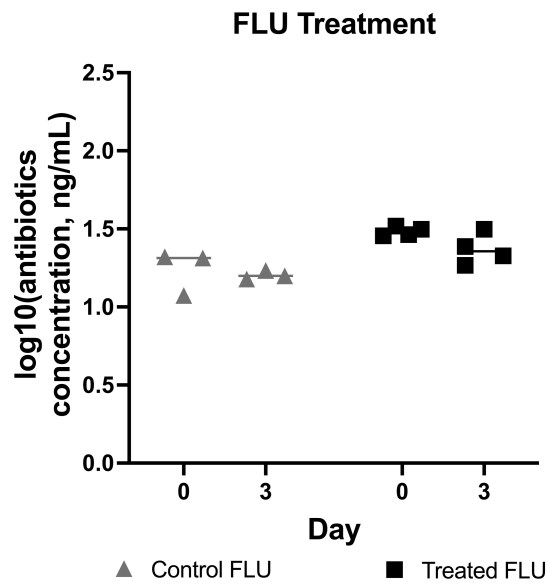

**Figure A.5:** log10(concentration) changes for quinolone FLU. The solid line is the median of the data points for that group.

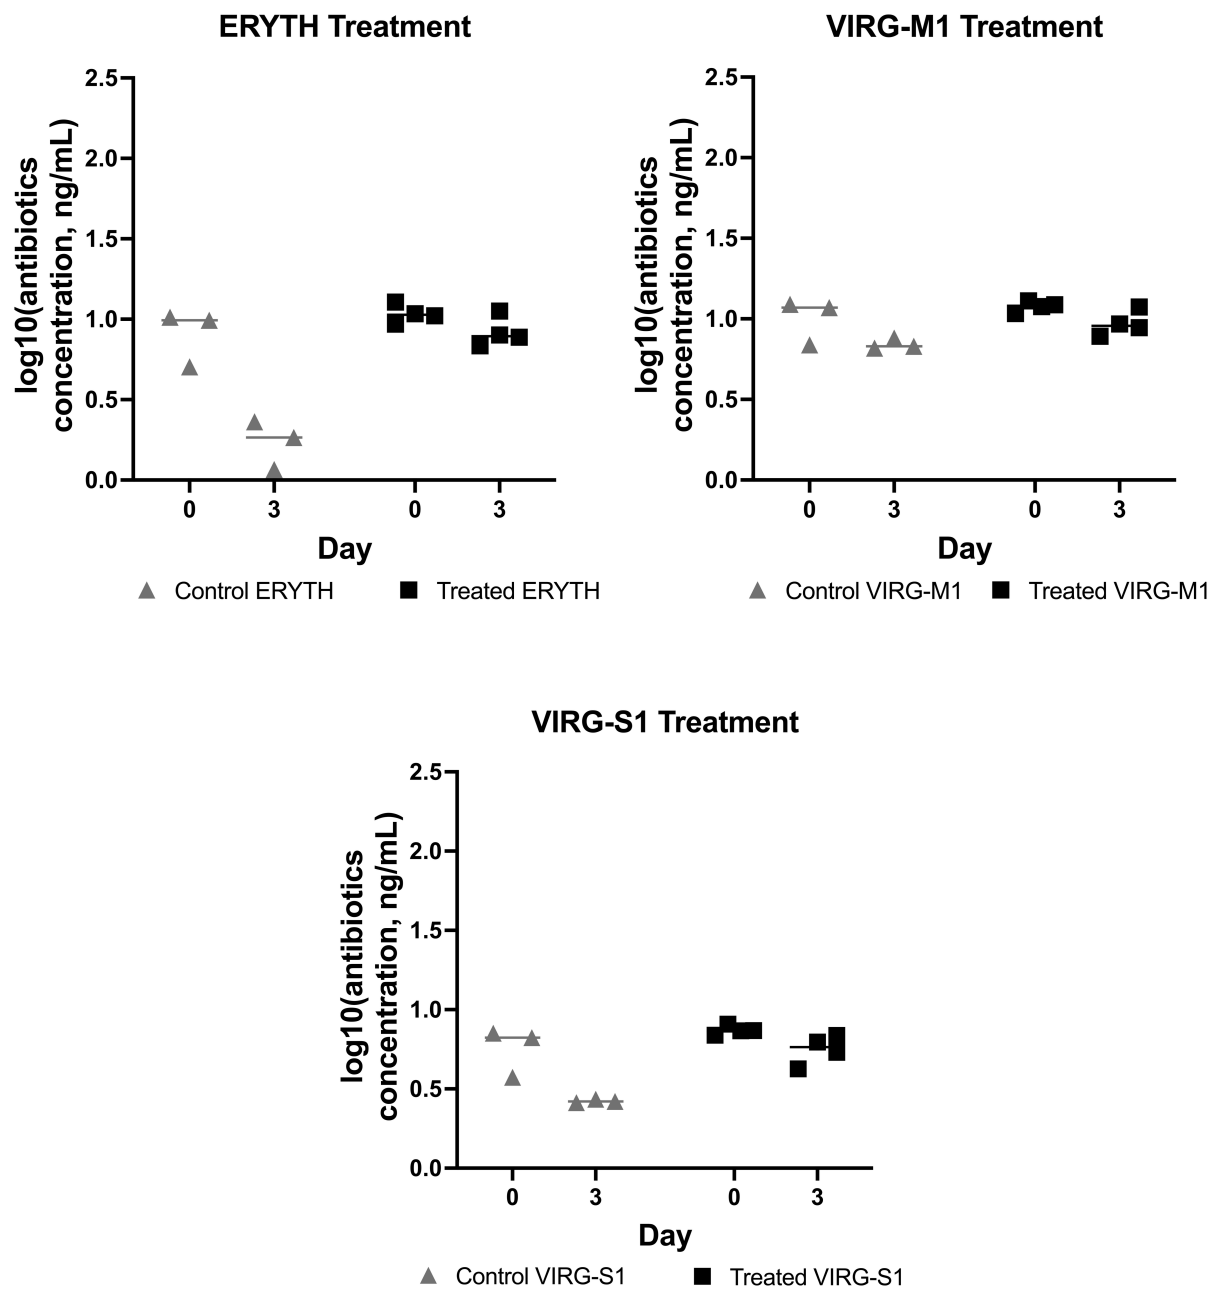

**Figure A.6:** log<sub>10</sub>(concentration) changes for macrolides ERYTH, VIRG-M1, VIRG-S1. The solid line is the median of the data points for that group.
